# Supplementary material for: Uncovering Biosecurity Gaps: Risk Factors for PRRSV Seropositivity in Costa Rican Pig Farms Identified Through Machine Learning
Source: Research Square preprint supplement (doi:10.21203/rs.3.rs-7418920/v1), 2025-09-01
Supplement: Supplementary file 1 [file 469ed892fdb8da31c405cb8f.xlsx]

## Sheet: Tables
Table S2. Results of univariable logistic regression analysis for PRRSV positive status of the farm with each of the farm factors. Results are the frequency tables and calculated odds ratio with 95% confidence interval. Akaike's Information Criterion (AIC) can be used to consider the level of association: if the second AIC value (excluding factor) is lower than the first AIC (including factor), t…
Farm factor	Positive	Negative	Odds Ratio	Lower Limit	Upper Limit	Remark	AIC (including factor) AIC (excluding factor)
Production stages
Farrow to feeder	2	1	Ref				32.772
Farrow to finish	9	9	0.5	0.02	6.16		31.065
Gestation housing
All individually housed gestation	5	2	Ref				33.378
All pen gestation	3	6	0.2	0.02	1.55		31.065
Combination pen and individually housed gestation during less than 2 weeks of each mating cycle	1	0	1.36	0.03	3.91	firth correction
Combination pen and individually housed gestation during more than two weeks of each mating cycle	2	2	0.4	0.03	5.33
PRRsv Status
Naive - entire herd never exposed to PRRS virus	1	7	Ref				22.346
Negative but not naive - herd still contains previously exposed animals	1	2	3.5	0.11	123.59		31.065
Positive active, that is positive by ELISA and producing infected weaned pigs, not clinically stable	3	1	21.01	1.33	912.33
Positive, stable that is positive by ELISA but producing non-infected weaned pigs	6	0	65	0.21	177.95	firth correction
Time since most recent PRRSV clinical
> 24 months	3	0	Ref				24.93
12 to 24 months ago	1	0	0.44	0.01	54.26	firth correction	31.065
3 - 12 months	3	1	0.33	0.02	21.11	firth correction
Less than 3 months ago	2	0	0.71	0.01	60.13	firth correction
Never	2	9	0.04	0.01	6.36	firth correction
Historical controlled exposure
No	1	9	0.11	0.01	0.59		17.204
Yes	10	1	90.02	7.59	3547.51		31.065
Frequency with which needles are changed
Same needle used on an average of 16 or more animals	1	0	Ref				33.227
Same needle used on an average of 2 to 5 animals	1	2	0.2	0.01	21.94	firth correction	31.065
Same needle used on an average of 6 to 15 animals	0	1	0.11	0.004	35.59	firth correction
Separate needle for each individual animal	7	7	0.33	0.02	17.81	firth correction
Use needle-less syringe	2	0	1.67	0.02	102.89	firth correction
Frequency with which needles are changed used on pigs
One needle per farrowing crate (I.e., litter of pigs)	7	9	Ref				32.703
One needle per farrowing room	2	0	6.33	0.09	53.81	firth correction	31.065
Separate needle for each individual piglet	1	1	1.29	0.05	36.56
Use needle-less syringe	1	0	3.8	0.06	50.43	firth correction
feedback prior to entry
All site(s) currently naive	0	4	Ref				25.138
All site(s) currently negative	4	5	7.36	0.1	57	firth correction	31.065
One or more sources positive active that is positive by ELISA and producing PRRSv infected weaned pigs	4	0	81	0.11	420.11	firth correction
One or more sources positive stable - that is positive by ELISA but producing non-infected weaned pigs, none positive active or unknown status	1	1	9	0.06	104.59	firth correction
One or more sources with unknown status, none positive active	2	0	45	0.08	353.22	firth correction
PRRS virus status prior
All site(s) currently naive	0	3	Ref				28.162
All site(s) currently negative	5	6	5.92	0.09	51.72	firth correction	31.065
One or more sources positive by ELISA or PCR	4	1	21	0.11	123.28	firth correction
One or more sources with unknown status, none positive	2	0	35	0.07	325.96	firth correction
Location of replacement animal
Not Applicable (Select if closed site (replacements are born and raised at site and never moved from site) or if not acclimated to the PRRS virus prior to entry)	7	3	Ref				32.412
Off-site (different site from the sow herd)	1	0	1.4	0.04	36.2	firth correction	31.065
On-site in different air space as sow herd	2	5	0.17	0.02	1.29
On-site in same air space as sow herd	1	2	0.21	0.01	3.09
PRRSV status of replacements
Negative (0%)	0	2	Ref				29.864
Not tested or unknown	11	8	6.76	0.1	54.24	firth correction	31.065
Source of AI semen
All semen collected from boars at this site	3	2	Ref				35.185
Not Applicable (Select if 100% natural insemination)	1	2	0.33	0.01	6.15		31.065
Some or all sourced from other site(s) that are not part of same production system	6	6	0.67	0.04	5.53
Some or all sourced from other sites(s) that are part of same production system, none sourced from other sites not part of same production system	1	0	2.14	0.04	50.38	firth correction
Flow restrictions on vehicles
No restrictions, the same vehicle may haul PRRSV positive and negative or naive animals	4	2	Ref				28.059
The same vehicle never hauls both PRRSV positive and negative or naive animals	0	4	0.06	0.01	8.13	firth correction	31.065
Truck(s) are dedicated to this site and do not haul animals from other sites	7	4	0.88	0.09	7
Disinfectant use on vehicles used to transport animals to market or collection points
No disinfectant used or unknown	4	2	Ref				35.275
Hypochlorite (Clorox, Halazone, Chloramine-T) or peroxygen (Virkon) used	1	3	0.17	0.03	5.37		31.065
Iodine (Wescodyne, Premise, Iofec, Iosdyn, Losan), or quaternary ammonium combinations (Synergize, Aseptol) used	1	1	0.87	0.08	11.39
Quaternary ammonium (Roccal, Germex, Zephiran, Hi-Lethol, BioSentry) used	5	4	0.63	0.1	5.94
Disinfection of cab
No disinfectant used or unknown	7	6	Ref				32.444
Hypochlorite (Clorox, Halazone, Chloramine-T) or peroxygen (Virkon) used	1	3	0.29	0.05	5.15		31.065
Iodine (Wescodyne, Premise, Iofec, Iosdyn, Losan), or quaternary ammonium combinations (Synergize, Aseptol) used	0	1	0.29	0.02	16.93	firth correction
Phenol-based compound (BioPhene, Environ, Tek-Trol, Laro, Lysol) or aldehydes (DC&R, Cidex, Formaldegen) used	1	0	2.6	0.05	43.97	firth correction
Quaternary ammonium (Roccal, Germex, Zephiran, Hi-Lethol, BioSentry) used	2	0	4.33	0.08	46.98	firth correction
Boot and clothing restrictions
No requirements	7	4	Ref				30.326
Required to change boots but not clothing between sites	3	1	1.71	0.15	41.39		31.065
Required to change clothing and boots between sites	1	5	0.11	0.01	1.04
Disinfectant use on vehicles
No disinfectant used or unknown	3	2	Ref				38.911
Hypochlorite (Clorox, Halazone, Chloramine-T) or peroxygen (Virkon) used	1	1	0.67	0.03	13.58		31.065
Iodine (Wescodyne, Premise, Iofec, Iosdyn, Losan), or quaternary ammonium combinations (Synergize, Aseptol) used	1	1	0.67	0.03	13.58
Not Applicable (Select if vehicle used to transport animals is dedicated to this site)	4	4	0.67	0.09	6.74
Quaternary ammonium (Roccal, Germex, Zephiran, Hi-Lethol, BioSentry) used	2	2	0.67	0.06	9.14
Route restrictions on vehicles used to transport genetic animals
No special route selection practices	10	10	Ref				31.726
Transport routes are outlined proactively to avoid roads with swine and swine-related sites along the route	1	0	3	0.06	44.26	firth correction	31.065
Use restrictions on vehicles used to transport genetic animals
Vehicles used to transport genetic animals to and from other sites within the production system are not used to transport non-genetic animals or animals to market or collection points	8	6	Ref				32.682
Vehicles used to transport genetic animals to and from other sites within the production system may transport non-genetic animals or animals to market or collection points	3	4	0.56	0.08	3.51		31.065
Disinfectant use on vehicles used to transport genetic animals
No disinfectant used or unknown	2	3	Ref				29.315
Hypochlorite (Clorox, Halazone, Chloramine-T) or peroxygen (Virkon) used	0	2	0.28	0.02	18	firth correction	31.065
Iodine (Wescodyne, Premise, Iofec, Iosdyn, Losan), or quaternary ammonium combinations (Synergize, Aseptol) used	0	2	0.28	0.02	18	firth correction
Not Applicable (Select if vehicle used to transport animals is dedicated to this site)	3	0	9.8	0.09	79.03	firth correction
Phenol-based compound (BioPhene, Environ, Tek-Trol, Laro, Lysol) or aldehydes (DC&R, Cidex, Formaldegen) used	1	0	4.2	0.05	67.49	firth correction
Quaternary ammonium (Roccal, Germex, Zephiran, Hi-Lethol, BioSentry) used	5	3	2.2	0.17	11.56	firth correction
Type of load out area
Load out area attached to buildings, no restrictions on truck driver access	4	5	Ref				34.598
Load out area attached to buildings, physical barriers restrict truck driver access to "dirty" areas"	1	1	1.25	0.04	39.02		31.065
Unattached animal transfer station located away from the swine buildings	6	4	1.88	0.31	12.54
Flow of feed trucks
No restrictions, the same truck may deliver feed to PRRSV positive and negative or naive sites	4	1	Ref				30.934
The same truck never delivers feed to PRRSV positive and negative or naive sites or truck is dedicated to this site	7	9	0.19	0.01	1.69		31.065
Flow of on-site employee vehicles
No restrictions	2	2	1	0.12	8.33		33.053
Not allowed to visit other pig farm sites	9	8	1.13	0.11	11.26		31.065
Sanitation procedure for employees and visitors entering site
Shower in and clothes changed prior to entry	2	7	Ref				27.069
Boot wash / disinfection prior to entry	0	1	1	0.03	33.32	firth correction	31.065
Coverall and boot change, hands are washed prior to entry	2	0	15	0.11	93.04	firth correction
Unrestricted entry	7	2	12.25	0.32	22.48
Employee restrictions on visits to other swine production facilities
No restrictions	6	2	Ref				30.274
Not Applicable (Select if a single owner-operator that has no employees)	1	0	1.15	0.03	35.86	firth correction	31.065
Visits to other swine farms are restricted	4	8	0.17	0.02	1.1
New employees receive formal training on biosecurity procedures
No	9	3	3	0.9	13.52		27.031
Yes	2	7	0.1	0.01	0.64		31.065
Procedures for introducing tools and supplies
Direct introduction into the farm (no disinfection, no quarantine)	10	8	Ref				33.503
Disinfection prior to introduction into the farm, and quarantine for 24 hours or more	0	1	0.27	0.02	15.75	firth correction	31.065
Quarantine for 24 hours or more, but no disinfection	1	1	0.8	0.03	22.4
Restrictions on employee access to site
Access to site (by key, combination or pass code) is restricted after-hours only	10	2	Ref				22.22
Access to site (by key, combination or pass code) is restricted at all times	0	3	0.03	0.01	6.05	firth correction	31.065
Not restricted	1	5	0.04	0.002	0.41
Distance (miles) to nearest PRRSV positive swine farm
< 10	6	1	1.08	0.025	4.73		26.9
> 10	0	3	0.03	0.007	7.19		31.065
Unknown	5	6	0.14	0.04	3.49
Topography at the site
Flat	2	7	Ref				30.409
Gentle rolling hills	3	1	10.5	0.83	298.27		31.065
Mountains	5	2	8.75	1.05	112.51
Steep hills	1	0	1	0.03	33.32	firth correction
Gestation housing
All individually housed gestation	5	2	Ref				32.563
All pen gestation	3	6	0.2	0.02	1.55		31.065
Combination pen and individually housed gestation	3	2	0.6	0.05	7.34
PRRSV Status
Naive - entire herd never exposed to PRRS virus	1	7	Ref				22.349
Negative but not naive - herd still contains previously exposed animals	1	2	3.5	0.11	123.59		31.065
Positive stable or active	9	1	62.99	5.08	2525.01
Time since most recent PRRSV clinical
Never	2	9	Ref				20.933
Sometime ago	9	1	40.49	4.34	1037.95		31.065
Frequency with which needles are changed used on pigs
One needle per farrowing crate (I.e., litter of pigs)	7	9	Ref				31.749
One needle per farrowing room	2	0	6.33	0.09	53.81	firth correction	31.065
Seperate needle per piglet of needle-less	2	1	2.57	0.21	62.3
feedback prior to entry
All sites naive, negative or unknown/not positive	6	9	Ref				29.597
Positive stable or active	5	1	7.5	0.91	164.02		31.065
PRRS virus status prior
One or more sources positive by ELISA or PCR	4	1	Ref				30.934
Naive, negative or unknown	7	9	0.19	0.01	1.69		31.065
Location of replacement animal
Closed site	7	3	Ref				30.638
Not closed herd site	4	7	0.25	0.03	1.43		31.065
Source of A semen
All semen form this site	4	4	Ref				33.035
Some or all sourced from other site(s)	7	6	1.17	0.19	7.08		31.065
Flow restrictions on vehicles
Truck(s) are dedicated to this site and do not haul animals from other sites	7	4	Ref				31.881
No restrictions or not together	4	6	0.38	0.06	2.15		31.065
Disinfectant use on vehicles used to transport animals to market or collection points
No disinfectant used or unknown	4	2	Ref				32.366
Use of any disinfectant	7	8	0.44	0.05	2.99		31.065
Disinfection of cab
No disinfectant used or unknown	7	6	Ref				33.035
Use of any disinfectant	4	4	0.86	0.14	5.15		31.065
Disinfectant use on vehicles
No disinfectant used or unknown	3	2	Ref				32.911
Use of any disinfectant or NA	8	8	0.67	0.07	5.12		31.065
Disinfectant use on vehicles used to transport genetic animals
No disinfectant used or unknown	2	3	Ref				32.66
Use of any disinfectant or NA	9	7	1.93	0.25	17.94		31.065
Sanitation procedure for employees and visitors entering site
Unrestricted entry	7	2	Ref				28.811
One or more restrictions	4	8	0.14	0.02	0.91		31.065
Distance to nearest PRRSV positive swine farm
Unknown	5	6	Ref				32.618
Known	6	4	1.8	0.32	10.91		31.065
Topography at the site
Flat	2	7	Ref				27.031
Hills or mountains	9	3	10.5	1.57	105		31.065
Number of sows
< 375	5	6	Ref				32.618
> 375	6	4	1.8	0.32	10.91		31.065
Average parity
< 3.5	7	6	Ref				33.035
> 3.5	4	4	0.86	0.14	5.15		31.065
Number of clinical outbreaks last 1 year
< 0	6	9	Ref				29.597
> 0	5	1	7.5	0.91	164.02		31.065
Source of breeding herds in last 2 years
< 1	9	9	Ref				32.772
> 1	2	1	2	0.16	47.7		31.065
Isolation / acclimation period (days)
> 15	5	6	Ref				32.618
> 15	6	4	1.8	0.32	10.91		31.065
Breeding females per on-site employee
< 58	4	7	Ref				30.638
> 58	7	3	4.08	0.7	29.08		31.065
Pig density (swine sites) within 1 mile radius of this site
< 0	6	7	Ref				32.53
> 0	5	3	1.94	0.33	13.04		31.065
Pig density (swine sites) in a 1 to 3 mile radius of this site
< 0	6	7	Ref				32.53
> 0	5	3	1.94	0.33	13.04		31.065
Pig density (swine sites) in a 3 to 5 mile radius of this site...129
< 1.5	8	4	Ref				30.734
>1.5	3	6	0.25	0.04	1.47		31.065
Distance (miles) to a major public road with intensive animal transportation
< 1	8	5	Ref				31.908
>1	3	5	0.38	0.05	5.3		31.065
Distance (miles) to nearest swine market, slaughter plant or collection point
< 14.3	8	3	Ref				29.108
> 14.3	3	7	0.16	0.02	0.97		31.065
Footnotes:
Ref = Reference category
Numerical factors are dicotomized on the median
Firth correction was applied when one or more frequencies had zero count (0)

## Sheet: OR calculation
	how to calculate OR and 95%CI with firth correction
							95%CI
		pos	neg			OR	LL	UL
	Ref cat	6	1			0.032967	0.00718097	7.18848
	other cat	0	3
	how to calculate OR (uncorrected)
		pos	neg			OR	LL	UL
	Ref cat	6	1			0.138889	0.0374646	3.49094
	other cat	5	6
